# Supplementary material for: Large perpendicular magnetic anisotropy of transition metal dimers driven by polarization switching of a two-dimensional ferroelectric In2Se3 substrate
Source: Royal Society of Chemistry journal article supplement (doi:10.1039/d2cp01864k), 2022-01-01
Supplement: d2cp01864k1.pdf [file d2cp01864k1.pdf]

Large perpendicular magnetic anisotropy of transition metal dimers  
driven by polarization switching of two-dimensional ferroelectric  
 $\text{In}_2\text{Se}_3$  substrate

Wen Qiao,<sup>a</sup> Deyou Jin,<sup>a</sup> Wenbo Mi,<sup>b</sup> Dunhui Wang,<sup>a</sup> Shiming Yan,<sup>\*a</sup> Xiaoyong Xu,<sup>\*c</sup> Tiejun

Zhou<sup>a</sup>

<sup>a</sup> *School of Electronics and Information, Hangzhou Dianzi University, Hangzhou 310018, China*

<sup>b</sup> *Tianjin Key Laboratory of Low Dimensional Materials Physics and Preparation Technology,*

*School of Science, Tianjin University, Tianjin 300354, China*

<sup>c</sup> *School of Physics Science and Technology, Yangzhou University, Yangzhou, 225002, China*

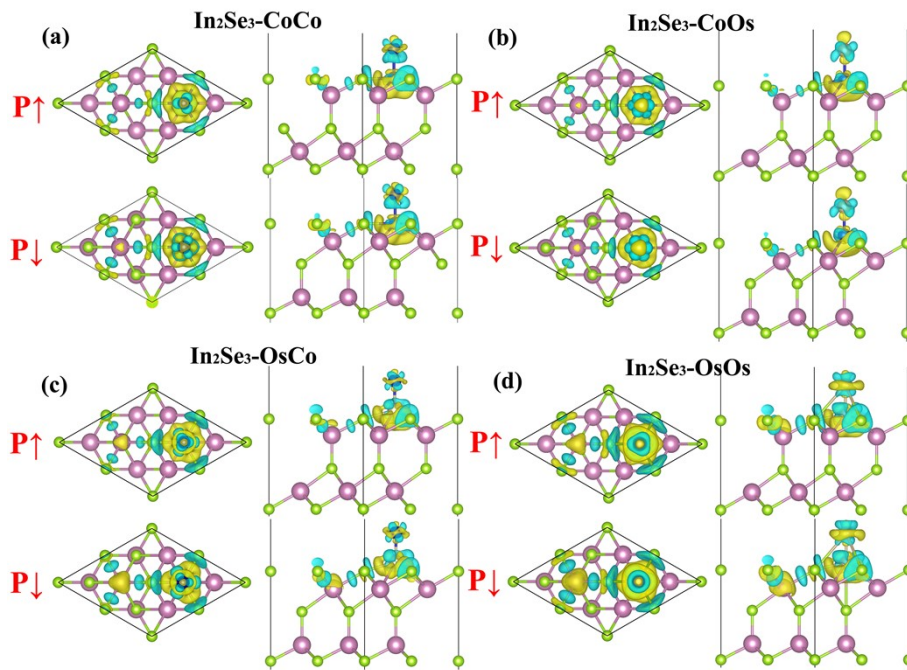

Fig. S1 Charge difference between the total charge density and the sum of charge densities of a suspended transition metal dimers and  $\text{In}_2\text{Se}_3$  for (a)  $\text{In}_2\text{Se}_3\text{-CoCo}$ , (b)  $\text{In}_2\text{Se}_3\text{-CoOs}$ , (c)  $\text{In}_2\text{Se}_3\text{-OsCo}$  and (d)  $\text{In}_2\text{Se}_3\text{-OsOs}$ .

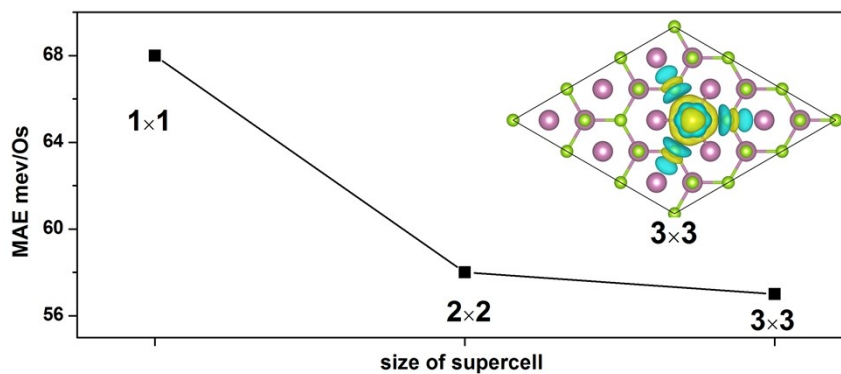

Fig. S2 Dependence of size of supercell on the MAE of Os atom in  $\text{In}_2\text{Se}_3\text{-CoOs}$  with FE polarization  $P\downarrow$ . Inset show the charge difference density of the  $3\times 3$   $\text{In}_2\text{Se}_3\text{-CoOs}$  supercell with FE polarization  $P\downarrow$ .

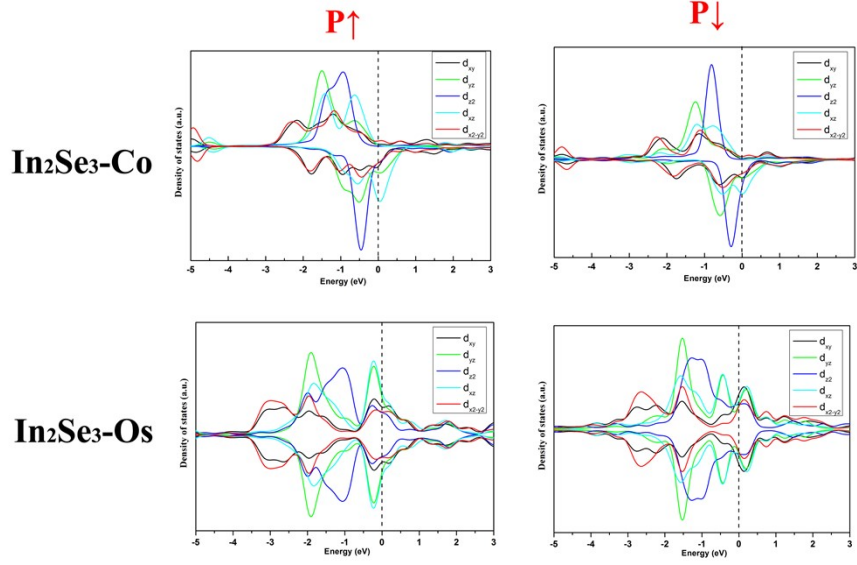

Fig. S3 PDOS of Co atom and Os atom in  $\text{In}_2\text{Se}_3\text{-Co}$  and  $\text{In}_2\text{Se}_3\text{-Os}$  with FE polarization  $P\uparrow$  and  $P\downarrow$ .

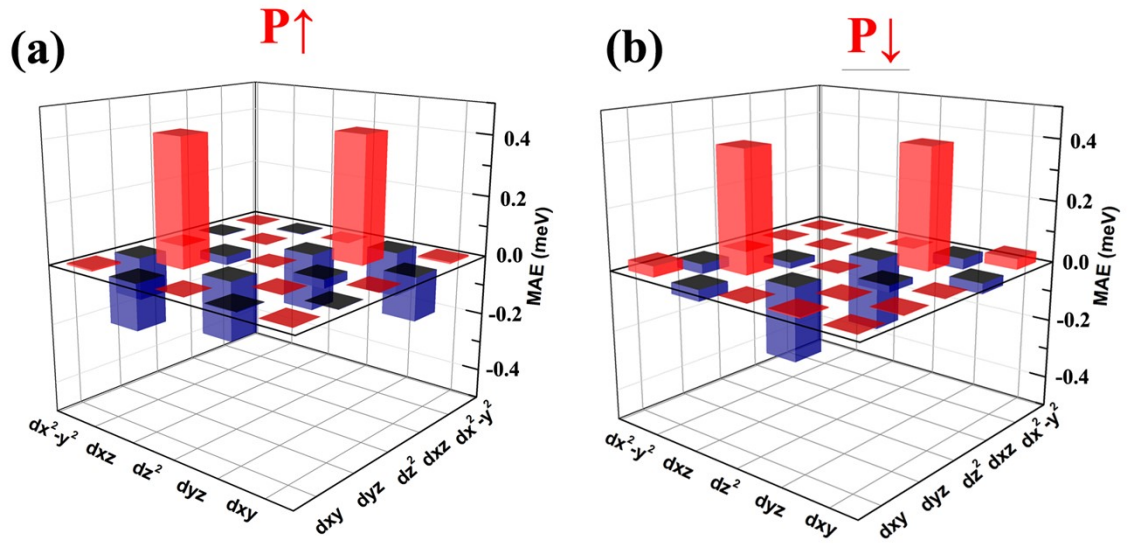

Fig. S4 Orbital-resolved MAE of Co atom in  $\text{In}_2\text{Se}_3\text{-Co}$  with FE polarization  $P\uparrow$  and  $P\downarrow$ .

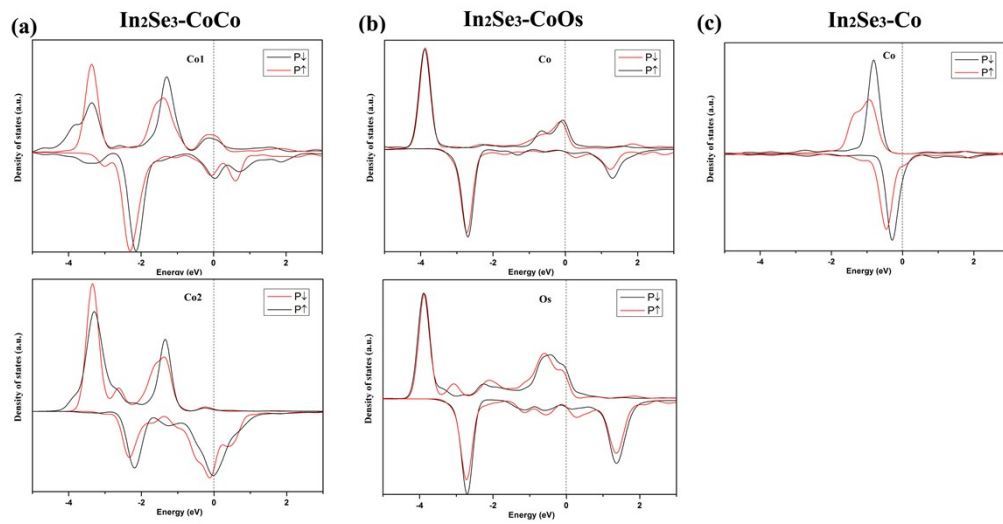

Fig. S5  $d_{z^2}$  PDOS of (a) Co1 and Co2 atoms in  $\text{In}_2\text{Se}_3\text{-CoCo}$ , (b) Co and Co atoms in  $\text{In}_2\text{Se}_3\text{-CoOs}$  and (c) Co atom in  $\text{In}_2\text{Se}_3\text{-Co}$  with FE polarization  $P_{\uparrow}$  and  $P_{\downarrow}$ .
